# Supplementary material for: Development and characterization of single step self-assembled lipid polymer hybrid nanoparticles for effective delivery of methotrexate
Source: Royal Society of Chemistry journal article supplement (doi:10.1039/c5ra12459j), 2015-01-01
Supplement: c5ra12459j1.pdf [file c5ra12459j1.pdf]

**SI Table 1:** Effect of surfactant concentration on size and EE of LPHNPs

| Formulation | Lutrol® F-87 conc. (w/v) | Zeta potential (mV) | Particle size (nm) | PDI         | EE (%)      |
|-------------|--------------------------|---------------------|--------------------|-------------|-------------|
| F3-I        | 0.5%                     | -15.67± 0.9         | 295.8±5.6          | 0.234± 0.02 | 78.8 ± 2.8  |
| F3-II       | 1%                       | -14.2 ± 0.9         | 249.1 ± 9.2        | 0.217± 0.01 | 71.90 ± 2.2 |
| F3-III      | 2%                       | -13.48± 0.8         | 224.7± 8.7         | 0.256± 0.03 | 68.34± 3.6  |
| F5-I        | 0.5%                     | -14.4±0.1           | 171.06± 8.9        | 0.157± 0.02 | 89.9± 2.6   |
| F5-II       | 1%                       | -13.8± 0.4          | 160.7 ± 7.3        | 0.157± 0.01 | 80.90±2.6   |
| F5-III      | 2%                       | -13.2±0.8           | 152.8± 8.9         | 0.134± 0.03 | 72.87± 2.1  |
| F9-I        | 0.5%                     | -14.8± 0.2          | 254.5± 11.2        | 0.223± 0.03 | 82.23 ± 3.2 |
| F9-II       | 1%                       | -13.21± 0.8         | 238.2± 9.7         | 0.252± 0.02 | 75.65 ± 2.8 |
| F9-III      | 2%                       | -12.92± 0.9         | 225.9± 9.3         | 0.223± 0.03 | 69.23±2.4   |

**SI Table 2:** Effect of Lipid to polymer ratio on characteristics of LPHNPs

| Formulations | Lipid   | Lipid: Polymer (wt:wt) | Zeta potential (mV) | Particle size (nm) | PDI         | EE (%)      |
|--------------|---------|------------------------|---------------------|--------------------|-------------|-------------|
| F3-I         | PL-90 G | 1:2                    | -15.67± 0.9         | 295.8±5.6          | 0.234± 0.02 | 78.8 ± 2.8  |
| F3-II        |         | 1:4                    | -17.2 ± 0.9         | 205.1 ± 9.2        | 0.217± 0.03 | 74.56±3.2   |
| F3-III       |         | 1:6                    | -20.48± 0.8         | 150.3 ± 8.7        | 0.256± 0.03 | 65.78±2.6   |
| F5-I         | PL-S100 | 1:2                    | -14.4±0.1           | 171.06± 8.9        | 0.157± 0.02 | 89.9± 2.6   |
| F5-II        |         | 1:4                    | -15.4 ± 2.4         | 115.7 ± 9.3        | 0.157±0.02  | 77.90±2.6   |
| F5-III       |         | 1:6                    | -18.8±1.8           | 76.1± 6.9          | 0.134± 0.01 | 71.94± 2.1  |
| F9-I         | L-SPC-3 | 1:2                    | -14.8± 2.2          | 254.5± 10.2        | 0.223± 0.03 | 82.23 ± 3.2 |
| F9-II        |         | 1:4                    | -17.21± 2.8         | 177.2± 9.7         | 0.252± 0.02 | 71.35± 2.8  |
| F9-III       |         | 1:6                    | -21.92± 1.9         | 125.8± 9.3         | 0.223± 0.02 | 64.45±2.4   |
